# Supplementary material for: WITHDRAWN: Clinical efficacy and pharmacokinetics/pharmacodynamics analysis of intravenous polymyxin B for critically ill patients with sepsis
Source: Research Square preprint supplement (doi:10.21203/rs.3.rs-8434801/v1), 2026-01-22
Supplement: Supplementary file 1 [file 5ff1b450aa5d66235232f17d.docx]

Supplement 1

[Table S1 Detail of comorbidities 2](#_Toc217124994)

[Table S2 Univariate and multivariate logistic model of risk factors for clinical success rate 3](#_Toc217124995)

[Table S3 Univariate and multivariate Accelerated Failure Time Model of risk factors for 90-days survival 5](#_Toc217124996)

[Table S4 Summary of demographic characteristics of patients with Continuous renal replacement therapy (CRRT) at baseline*a* 7](#_Toc217124997)

[Table S5 Univariate and multivariate Accelerated Failure Time Model of risk factors for 90-days survival in patients with CRRT 11](#_Toc217124998)

[Table S6 Summary of demographic characteristics of patients with pneumonia at baseline 13](#_Toc217124999)

[Table S7 Summary of demographic characteristics during the blood collection 17](#_Toc217125000)

[Table S8 ﻿Parameter estimates and bootstrap results of the final population PK model 18](#_Toc217125001)

[Table S9 The probability of target attainment (PTA) for different dosing regimens in patients with weight range of 40-80kg 19](#_Toc217125002)

## Table S1 Detail of comorbidities

| **Comorbidities** | Detail |
| --- | --- |
| Respiratory disease | ARDS, Pneumonia, COPD |
| Cardiovascular disease | Hypertension, Hyperlipidemia, Heart failure |
| Hepatic disease | Chronic hepatic disease, Hepatic failure |
| Central nervous system disease | Dementia, Hepatic encephalopathy, Alzheimer disease, Delirium |
| Kidney disease | CKD, AKI |

ARDS, Acute respiratory distress syndrome; COPD, Chronic obstructive pulmonary disease; CKD, Chronic kidney disease; AKI, Acute kidney injure.

## Table S2 Univariate and multivariate logistic model of risk factors for clinical success rate

|  | Univariate regression | | Multivariate regression | |
| --- | --- | --- | --- | --- |
|  | OR (95% CI) | P-value | OR (95% CI) | P-value |
| **Gender** |  |  |  |  |
| Male | Ref |  |  |  |
| Female | 2.67 (0.60-11.76) | 0.195 |  |  |
| **Age, years** | 0.99 (0.96-1.01) | 0.328 |  |  |
| **Weight, kg** | 1.01 (0.96-1.05) | 0.817 |  |  |
| **BMI, kg/m2** | 1.06 (0.91-1.24) | 0.426 |  |  |
| **APACHE-II scores** | 0.97 (0.89-1.05) | 0.43 |  |  |
| **SOFA score** | 0.82 (0.70-0.95) | 0.010* | 0.88 (0.74-1.05) | 0.146 |
| **ACCI** | 0.78 (0.62-0.98) | 0.030* | 0.78 (0.61-1.01) | 0.058 |
| **Spesis shock** | 0.35 (0.13-0.98) | 0.045 | 0.95 (0.26-3.38) | 0.931 |
| **Comorbidities** |  |  |  |  |
| Respiratory disease | 1.86 (0.42-8.19) | 0.411 |  |  |
| Cardiovascular disease | 0.86 (0.32-2.29) | 0.758 |  |  |
| Hepatic disease | 0.94 (0.32-2.69) | 0.901 |  |  |
| Central nervous system disease | 1.09 (0.38-3.09) | 0.870 |  |  |
| Kidney disease | 1.07 (0.37-3.08) | 0.901 |  |  |
| Acute pancreatitis | 2.54 (0.43-14.95) | 0.303 |  |  |
| Diabetes | 2.25 (0.77-6.59) | 0.139 |  |  |
| Immunodeficiency | 0.21 (0.02-1.88) | 0.162 |  |  |
| Malignancy | 0.67 (0.15-3.06) | 0.602 |  |  |
| **Bacteria clearance** | 1.71 (0.64-4.59) | 0.284 |  |  |
| **Pathogen** |  |  |  |  |
| A. baumannii | 2.29 (0.69-7.58) | 0.174 |  |  |
| K. pneumoniae | 2.53 (0.89-7.18) | 0.082 |  |  |
| P. aeruginosa | 0.58 (0.17-1.96) | 0.38 |  |  |
| E.coli | 1.83 (0.29-11.78) | 0.523 |  |  |
| Others | 0.94 (0.32-2.69) | 0.901 |  |  |
| **MIC, mg/L** |  |  |  |  |
| ≤0.5 | Ref |  |  |  |
| 1 | 0.28 (0.03-2.69) | 0.268 |  |  |
| 2 | 0.95 (0.27-3.32) | 0.933 |  |  |
| Unknown | 1.47 (0.29-7.45) | 0.639 |  |  |
| **Concomitant drugs** |  |  |  |  |
| Aminoglycosides | 0.57 (0.05-6.60) | 0.652 |  |  |
| BL-BLI | 0.48 (0.17-1.39) | 0.177 |  |  |
| Carbapenem | 0.89 (0.33-2.39) | 0.816 |  |  |
| Glycylcycline | 1.18 (0.42-3.29) | 0.749 |  |  |
| Inhaled polymyxin | 0.42 (0.15-1.16) | 0.093 |  |  |
| Quinolone | 0.00 (0.00-Inf) | 0.992 |  |  |
| **CRRT** | 0.24 (0.08-0.72) | 0.011* | 0.44 (0.12-1.66) | 0.226 |
| **Days of therapy** | 1.04 (0.98-1.10) | 0.202 |  |  |
| **Dose, mg/kg** |  |  |  |  |
| Loading dose*a* | 1.18 (0.70-1.97) | 0.538 |  |  |
| Maintenance dose | 1.21 (0.23-6.48) | 0.825 |  |  |
| **Daily dose by weight, mg/kg/d** | 0.89 (0.41-1.94) | 0.775 |  |  |
| **AUCss, 0-12h> 25.47 mg·h/L** | 3.31 (1.19-9.17) | 0.021* | 3.19 (1.01-10.05) | 0.047* |
| **Laboratory data** |  |  |  |  |
| PCT (ng/ml) | 1.06 (0.97-1.17) | 0.211 |  |  |
| WBC (×10^9/L) | 1.03 (0.97-1.09) | 0.361 |  |  |
| NEUT (×10^9/L) | 1.01 (0.95-1.08) | 0.773 |  |  |
| LY (×10^9/L) | 2.06 (0.86-4.93) | 0.104 |  |  |
| CRP (μg/L) | 1.00 (1.00-1.01) | 0.172 |  |  |
| TP (g/L) | 1.03 (0.98-1.08) | 0.287 |  |  |
| ALB (g/L) | 1.02 (0.94-1.10) | 0.704 |  |  |
| TBIL (μmol/L) | 0.99 (0.99-1.00) | 0.086 |  |  |
| ALT (U/L) | 0.99 (0.98-1.00) | 0.235 |  |  |
| AST (U/L) | 1.00 (0.99-1.00) | 0.267 |  |  |
| ALP (U/L) | 1.00 (0.99-1.00) | 0.322 |  |  |
| GGT (U/L) | 1.00 (0.99-1.00) | 0.182 |  |  |

*a.* Data represent the loading dose administered in 67 of 82 patients.

BMI, body mass index; APACHE-Ⅱ scores, Acute Physiology and Chronic Health Evaluation Ⅱ scores; SOFA score, Sequential Organ Failure Assessment Score; ACCI, Adjusted Charlson comorbidity index; CRRT, Continuous renal replacement therapy; BL-BLI, Beta-lactam/beta-lactamase inhibitor combinations; PCT, Procalcitonin; WBC, White blood cell; NUET, Neutrophils; LY, Lymphocyte; CRP, C-reactive protein; TP, Total protein; ALB, Serum albumin; TBIL, Total bilirubin; ALT, Alanine aminotransferase; AST, Aspartate aminotransferase; ALP, Alkaline Phosphatase; GGT, Gamma-glutamyl transferase.

* P-value<0.05.

## Table S3 Univariate and multivariate Accelerated Failure Time Model of risk factors for 90-days survival

|  | Univariate regression | | Multivariate regression | |
| --- | --- | --- | --- | --- |
|  | ETR (95% CI) | P-value | ETR (95% CI) | P-value |
| **Gender** |  |  |  |  |
| Male | Ref |  |  |  |
| Female | 1.60 (0.54-4.76) | 0.401 |  |  |
| **Age, years** | 0.98 (0.96-1.00) | 0.089 |  |  |
| **Weight, kg** | 0.99 (0.96-1.02) | 0.381 |  |  |
| **BMI, kg/m2** | 0.99 (0.90-1.09) | 0.834 |  |  |
| **APACHE-II scores** | 0.95 (0.90-1.01) | 0.079 |  |  |
| **SOFA score** | 0.86 (0.80-0.92) | <0.001** | 0.98 (0.90-1.06) | 0.591 |
| **ACCI** | 0.83 (0.73-0.95) | 0.007** | 0.87 (0.77-0.98) | 0.027* |
| **Spesis shock** | 0.17 (0.07-0.43) | <0.001** | 0.30 (0.14-0.65) | 0.002** |
| **Comorbidities** |  |  |  |  |
| Respiratory disease | 0.82 (0.34-1.98) | 0.659 |  |  |
| Cardiovascular disease | 0.89 (0.45-1.77) | 0737 |  |  |
| Hepatic disease | 0.46 (0.23-0.92) | 0.028* | 0.52 (0.29-0.93) | 0.027* |
| Central nervous system disease | 0.62 (0.31-1.26) | 0.188 |  |  |
| Kidney disease | 0.53 (0.23-1.20) | 0.129 |  |  |
| Acute pancreatitis | 1.11 (0.38-3.27) | 0.844 |  |  |
| Diabetes | 1.28 (0.60-2.70) | 0.524 |  |  |
| Immunodeficiency | 0.25 (0.11-0.58) | 0.001** | 0.45 (0.20-1.00) | 0.051 |
| Malignancy | 1.38 (0.51-3.73) | 0.522 |  |  |
| **Infection sites** |  |  |  |  |
| Lung | 1.62 (0.74-3.55) | 0.228 |  |  |
| Abdomen | 0.46 (0.22-0.98) | 0.043* | 0.88 (0.43-1.81) | 0.727 |
| Blood | 1.07 (0.47-2.41) | 0.878 |  |  |
| Others | 0.54 (0.27-1.09) | 0.087 |  |  |
| **Bacteria clearance** | 1.68 (0.85-3.31) | 0.134 |  |  |
| **Pathogen** |  |  |  |  |
| A. baumannii | 1.31 (0.65-2.67) | 0.454 |  |  |
| K. pneumoniae | 1.83 (0.83-4.04) | 0.134 |  |  |
| P. aeruginosa | 1.01 (0.42-2.47) | 0.976 |  |  |
| E.coli | 0.84 (0.26-2.76) | 0.774 |  |  |
| Others | 0.84 (0.26-2.76) | 0.774 |  |  |
| **MIC, mg/L** |  |  |  |  |
| ≤0.5 | Ref |  |  |  |
| 1 | 1.79 (0.45-7.05) | 0.406 |  |  |
| 2 | 1.34 (0.52-3.47) | 0.550 |  |  |
| Unknown | 1.07 (0.41-2.78) | 0.889 |  |  |
| **Concomitant drugs** |  |  |  |  |
| Aminoglycosides | 0.69 (0.13-3.52) | 0.651 |  |  |
| BLBLI | 0.53 (0.27-1.05) | 0.069 |  |  |
| Carbapenem | 0.71 (0.36-1.43) | 0.340 |  |  |
| Glycylcycline | 1.22 (0.61-2.45) | 0.571 |  |  |
| Inhaled polymyxin | 0.86 (0.42-1.73) | 0.665 |  |  |
| Quinolone | 1.41 (0.14-14.32) | 0.771 |  |  |
| **CRRT** | 0.36 (0.18-0.71) | 0.003** | 1.08 (0.55-2.15) | 0.820 |
| **Days of therapy** | 1.02 (0.98-1.06) | 0.243 |  |  |
| **Dose, mg/kg** |  |  |  |  |
| Loading dose | 1.28 (0.91-1.80) | 0.150 |  |  |
| Maintenance dose | 1.93 (0.45-8.28) | 0.379 |  |  |
| **Daily dose by weight, mg/kg/d** |  |  |  |  |
| **AUCss, 0-12h> 27.10 mg·h/L** | 2.29 (1.17-4.50) | 0.016* | 1.92 (1.03-3.58) | 0.039* |
| **Laboratory data at baseline** | |  |  |  |
| PCT (ng/ml) | 1.01 (0.99-1.02) | 0.405 |  |  |
| WBC (×10^9/L) | 1.01 (0.96-1.06) | 0.694 |  |  |
| NEUT (×10^9/L) | 0.99 (0.95-1.04) | 0.850 |  |  |
| LY (×10^9/L) | 1.84 (0.93-3.65) | 0.082 |  |  |
| CRP (μg/L) | 1.00 (1.00-1.01) | 0.510 |  |  |
| TP (g/L) | 1.02 (0.99-1.05) | 0.212 |  |  |
| ALB (g/L) | 1.01 (0.96-1.07) | 0.655 |  |  |
| TBIL (μmol/L) | 1.00 (1.00-1.00) | 0.115 |  |  |
| ALT (U/L) | 1.00 (0.99-1.00) | 0.049* | 1.00 (1.00-1.01) | 0.291 |
| AST (U/L) | 1.00 (1.00-1.00) | <0.001** | 1.00 (1.00-1.00) | 0.121 |
| ALP (U/L) | 1.00 (1.00-1.00) | 0.960 |  |  |
| GGT (U/L) | 1.00 (1.00-1.00) | 0.651 |  |  |

ETR, Event-Time Ratio; BMI, body mass index; APACHE-Ⅱ scores, Acute Physiology and Chronic Health Evaluation Ⅱ scores; SOFA score, Sequential Organ Failure Assessment Score; ACCI, Adjusted Charlson comorbidity index; CRRT, Continuous renal replacement therapy; BL-BLI, Beta-lactam/beta-lactamase inhibitor combinations; PCT, Procalcitonin; WBC, White blood cell; NUET, Neutrophils; LY, Lymphocyte; CRP, C-reactive protein; TP, Total protein; ALB, Serum albumin; TBIL, Total bilirubin; ALP, Alkaline Phosphatase; GGT, Gamma-glutamyl transferase; ALT, Alanine aminotransferase; AST, Aspartate aminotransferase.

* P-value<0.05, ** P-value <0.01.

## Table S4 Summary of demographic characteristics of patients with Continuous renal replacement therapy (CRRT) at baseline*a*

| **Characteristic** | **Total (N=34)** | **Clinical success (N=8)** | **Clinical failure (N=26)** | **p-value** |
| --- | --- | --- | --- | --- |
| **Gender, n (%)** |  |  |  | 0.064 |
| Male | 27 (79.41%) | 4 (50.00%) | 23 (88.46%) |  |
| Female | 7 (20.59%) | 4 (50.00%) | 3 (11.54%) |  |
| **Age, years** | 60.00 (52.00, 69.00) | 64.50 (42.50, 77.50) | 59.50 (52.00, 67.00) | 0.477 |
| **Weight, kg** | 62.22 ± 11.92 | 61.50 ± 14.09 | 62.45 ± 11.48 | 0.848 |
| **BMI, kg/m2** | 22.14 ± 3.29 | 22.71 ± 2.47 | 21.97 ± 3.53 | 0.586 |
| **APACHE-II score** | 19.65 ± 5.78 | 20.25 ± 4.92 | 19.46 ± 6.09 | 0.741 |
| **SOFA score** | 13.38 ± 4.52 | 12.00 ± 4.66 | 13.81 ± 4.48 | 0.330 |
| **ACCI** | 4.26 ± 2.44 | 4.25 ± 2.43 | 4.27 ± 2.49 | 0.985 |
| **Spesis shock, n (%)** | 28 (82.35%) | 5 (62.50%) | 23 (88.46%) | 0.248 |
| **Comorbidities, n (%)** |  |  |  |  |
| Respiratory disease | 30 (88.24%) | 6 (75.00%) | 24 (92.31%) | 0.483 |
| Cardiovascular disease | 21 (61.76%) | 6 (75.00%) | 15 (57.69%) | 0.642 |
| Hepatic disease | 14 (41.18%) | 4 (50.00%) | 10 (38.46%) | 0.866 |
| Central nervous system disease | 11 (32.35%) | 3 (37.50%) | 8 (30.77%) | 1.000 |
| Acute pancreatitis | 4 (11.76%) | 2 (25.00%) | 2 (7.69%) | 0.483 |
| Diabetes | 13 (38.24%) | 5 (62.50%) | 8 (30.77%) | 0.231 |
| Immunodeficiency | 6 (17.65%) | 2 (25.00%) | 4 (15.38%) | 0.925 |
| Malignancy | 3 (8.82%) | 0 | 3 (11.54%) | 0.769 |
| **Infection sites, n (%)** |  |  |  |  |
| Lung | 24 (70.60%) | 5 (62.50%) | 19 (73.08%) | 0.896 |
| Abdomen | 9 (26.47%) | 1 (12.50%) | 8 (30.77%) | 0.571 |
| Blood | 7 (20.60%) | 2 (25.00%) | 5 (19.23%) | 1.000 |
| Others | 14 (41.18%) | 5 (62.50%) | 9 (34.62%) | 0.322 |
| **Pathogen, n (%)** |  |  |  |  |
| A. baumannii | 19 (55.88%) | 4 (50.00%) | 15 (57.69%) | 1.000 |
| K. pneumoniae | 11 (32.35%) | 3 (37.50%) | 8 (30.77%) | 1.000 |
| P. aeruginosa | 6 (17.66%) | 1 (12.50%) | 5 (19.23%) | 1.000 |
| E. coli | 2 (5.99%) | 0 | 2 (7.69%) | 1.000 |
| Others | 9 (26.47%) | 1 (12.50%) | 8 (30.77%) | 0.571 |
| **MIC, mg/L** |  |  |  |  |
| ≤0.5 | 23 (67.65%) | 5 (62.50%) | 18 (69.23%) | 0.271 |
| 1 | 2 (5.88%) | 1 (12.50%) | 1 (3.85%) |  |
| 2 | 5 (14.71%) | 0 | 5 (19.23%) |  |
| Unknown | 4 (11.76%) | 2 (25.00%) | 2 (7.69%) |  |
| **Urine output in 24h, ml** | 268.00 (60.00, 1200.00) | 258.00 (96.00, 693.50) | 295.00 (48.00, 1222.50) | 0.935 |
| **Days of therapy** | 14.00 (9.00, 20.00) | 15.50 (13.50, 21.00) | 12.00 (8.00, 20.00) | 0.200 |
| **Dose, mg/kg** |  |  |  |  |
| Loading dose*b* | 2.00 (1.59, 2.67) | 1.78 (1.52, 2.66) | 2.00 (1.67, 2.67) | 0.420 |
| Maintenance dose | 1.00 (0.83, 1.29) | 0.92 (0.78, 1.23) | 1.08 (0.86, 1.33) | 0.193 |
| **Daily dose by weight, mg/kg/d** | 2.32 ± 0.68 | 2.01 ± 0.46 | 2.42 ± 0.71 | 0.139 |
| **Concomitant drugs, n (%)** |  |  |  |  |
| Aminoglycosides | 2 (5.88%) | 1 (12.50%) | 1 (3.85%) | 0.960 |
| BL-BLI | 17 (50.00%) | 3 (37.50%) | 14 (53.85%) | 0.686 |
| Carbapenem | 19 (55.88%) | 5 (62.50%) | 14 (53.85%) | 0.981 |
| Glycylcyclines | 20 (58.82%) | 4 (50.00%) | 16 (61.54%) | 0.866 |
| Inhaled polymyxins | 10 (29.41%) | 1 (12.50%) | 9 (34.62%) | 0.449 |
| Quinolone | 2 (5.88%) | 0 | 2 (7.69%) | 1.000 |
| **Laboratory data at baseline** | |  |  |  |
| CREA (umol/L) | 107.50 (68.00, 214.00) | 217.00 (189.50, 229.50) | 92.00 (56.00, 138.00) | 0.024* |
| BUN (mmol/L) | 11.90 (8.20, 20.50) | 23.95 (13.50, 30.05) | 11.05 (8.20, 14.00) | 0.092 |
| PCT (ng/ml) | 2.64 (1.75, 6.55) | 5.54 (2.20, 34.23) | 2.44 (1.66, 4.88) | 0.216 |
| WBC (×10^9/L) | 14.08 ± 8.04 | 16.09 ± 9.77 | 13.46 ± 7.54 | 0.428 |
| NEUT (×10^9/L) | 12.66 ± 7.09 | 12.79 ± 7.01 | 12.62 ± 7.25 | 0.953 |
| LY (×10^9/L) | 0.65 (0.23, 1.10) | 0.97 (0.52, 1.59) | 0.45 (0.22, 0.93) | 0.118 |
| CRP (mg/L) | 120.75 ± 74.97 | 120.96 ± 93.27 | 120.69 ± 70.59 | 0.993 |
| TP (g/L) | 59.64 ± 8.93 | 58.66 ± 9.91 | 59.93 ± 8.79 | 0.730 |
| ALB (g/L) | 34.06 ± 4.97 | 32.76 ± 5.55 | 34.46 ± 4.83 | 0.407 |
| TBIL (μmol/L) | 47.55 (24.70, 159.60) | 33.20 (20.45, 95.90) | 67.55 (25.70, 187.60) | 0.563 |
| ALT (U/L) | 26.00 (11.00, 62.00) | 17.00 (7.50, 32.50) | 31.00 (14.00, 73.00) | 0.161 |
| AST (U/L) | 50.50 (30.00, 198.00) | 37.50 (30.00, 133.50) | 55.00 (28.00, 198.00) | 0.465 |
| ALP (U/L) | 154.00 (91.00, 252.00) | 221.00 (158.00, 262.00) | 121.00 (80.00, 235.00) | 0.144 |
| GGT (U/L) | 91.00 (42.00, 180.00) | 144.00 (46.00, 259.50) | 91.00 (42.00, 148.00) | 0.405 |

*a.*Values presented as Median (IQR) or n (%); *b.*Data represent the loading dose administered in 29 of 34 patients.

BMI, body mass index; APACHE-Ⅱ scores, Acute Physiology and Chronic Health Evaluation Ⅱ scores; SOFA score, Sequential Organ Failure Assessment Score; ACCI, Adjusted Charlson comorbidity index; CRRT, Continuous renal replacement therapy; BL-BLI, Beta-lactam/beta-lactamase inhibitor combinations; PCT, Procalcitonin; WBC, White blood cell; NUET, Neutrophils; LY, Lymphocyte; CRP, C-reactive protein; TP, Total protein; ALB, Serum albumin; TBIL, Total bilirubin; ALP, Alkaline Phosphatase; GGT, Gamma-glutamyl transferase; ALT, Alanine aminotransferase; AST, Aspartate aminotransferase.

* P-value<0.05.

## Table S5 Univariate and multivariate Accelerated Failure Time Model of risk factors for 90-days survival in patients with CRRT

|  | **Univariate regression** | | **Multivariate regression** | |
| --- | --- | --- | --- | --- |
| ETR (95% CI) | P-value | ETR (95% CI) | P-value |
| **Gender** |  |  |  |  |
| Male | Ref |  |  |  |
| Female | 1.58 (0.60-4.14) | 0.351 |  |  |
| **Age, years** | 0.99 (0.97-1.01) | 0.504 |  |  |
| **Weight, kg** | 0.97 (0.95-1.00) | 0.060 |  |  |
| **BMI, kg/m2** | 0.89 (0.81-0.98) | 0.022* | 0.99 (0.91-1.07) | 0.744 |
| **APACHE-II scores** | 1.03 (0.97-1.10) | 0.342 |  |  |
| **SOFA score** | 0.87 (0.82-0.93) | <0.001** | 0.93 (0.86-1.00) | 0.038* |
| **ACCI** | 0.98 (0.87-1.12) | 0.810 |  |  |
| **Spesis shock** | 0.29 (0.08-1.01) | 0.053 |  |  |
| **Comorbidities** |  |  |  |  |
| Respiratory disease | 0.40 (0.12-1.41) | 0.155 |  |  |
| Cardiovascular disease | 1.31 (0.64-2.70) | 0.462 |  |  |
| Hepatic disease | 0.44 (0.24-0.83) | 0.011* | 0.84 (0.45-1.56) | 0.578 |
| Central nervous system disease | 0.80 (0.38-1.65) | 0.540 |  |  |
| Kidney disease*a* | Not applicate |  |  |  |
| Acute pancreatitis | 0.67 (0.23-1.94) | 0.455 |  |  |
| Diabetes | 0.81 (0.40-1.65) | 0.569 |  |  |
| Immunodeficiency | 0.81 (0.33-1.95) | 0.633 |  |  |
| Malignancy | 1.25 (0.34-4.55) | 0.733 |  |  |
| **Infection sites** |  |  |  |  |
| Lung | 1.38 (0.65-2.90) | 0.402 |  |  |
| Abdomen | 0.50 (0.24-1.02) | 0.058 |  |  |
| Blood | 0.81 (0.36-1.85) | 0.620 |  |  |
| Others | 0.68 (0.35-1.34) | 0.267 |  |  |
| **Bacteria clearance** | 1.00 (0.50-2.02) | 0.997 |  |  |
| **Pathogen** |  |  |  |  |
| A. baumannii | 0.54 (0.27-1.09) | 0.088 |  |  |
| K. pneumoniae | 1.90 (0.86-4.20) | 0.114 |  |  |
| P. aeruginosa | 1.32 (0.45-3.90) | 0.613 |  |  |
| E.coli | 0.62 (0.17-2.23) | 0.465 |  |  |
| Others | 0.62 (0.17-2.23) | 0.465 |  |  |
| **MIC, mg/L** |  |  |  |  |
| ≤0.5 | Ref |  |  |  |
| 1 | 0.45 (0.12-1.65) | 0.228 |  |  |
| 2 | 0.93 (0.35-2.44) | 0.882 |  |  |
| Unknown | 0.78 (0.30-2.06) | 0.616 |  |  |
| **Concomitant drugs** |  |  |  |  |
| Aminoglycosides | 2.02 (0.33-12.26) | 0.443 |  |  |
| BL-BLI | 0.89 (0.44-1.78) | 0.733 |  |  |
| Carbapenem | 1.06 (0.51-2.21) | 0.883 |  |  |
| Glycylcycline | 0.60 (0.31-1.19) | 0.146 |  |  |
| Inhaled polymyxin | 1.45 (0.67-3.14) | 0.350 |  |  |
| Quinolone | 0.49 (0.09-2.89) | 0.434 |  |  |
| **Days of therapy** | 1.02 (0.98-1.06) | 0.388 |  |  |
| **Dose, mg/kg** |  |  |  |  |
| Loading dose*b* | 1.73 (1.28-2.35) | <0.001** | 1.38 (1.06-1.79) | 0.015* |
| Maintenance dose | 1.18 (0.37-3.76) | 0.774 |  |  |
| **Daily dose by weight, mg/kg/d** | 1.08 (0.65-1.79) | 0.764 |  |  |
| **AUCss, 0-12h> 27.10 mg·h/L** | 2.01 (0.98-4.13) | 0.057 |  |  |
| **Laboratory data at baseline** | |  |  |  |
| PCT (ng/ml) | 1.00 (0.99-1.01) | 0.704 |  |  |
| WBC (×10^9/L) | 1.00 (0.96-1.04) | 0.980 |  |  |
| NEUT (×10^9/L) | 0.97 (0.93-1.02) | 0.312 |  |  |
| LY (×10^9/L) | 1.46 (0.89-2.39) | 0.130 |  |  |
| CRP (μg/L) | 1.00 (1.00-1.00) | 0.899 |  |  |
| TP (g/L) | 1.01 (0.97-1.05) | 0.522 |  |  |
| ALB (g/L) | 1.00 (0.93-1.07) | 0.947 |  |  |
| TBIL (μmol/L) | 1.00 (0.99-1.00) | 0.002** | 1.00 (1.00-1.00) | 0.233 |
| ALT (U/L) | 1.00 (1.00-1.00) | 0.151 |  |  |
| AST (U/L) | 1.00 (1.00-1.00) | 0.003** | 1.00 (1.00-1.00) | 0.007** |
| ALP (U/L) | 1.00 (1.00-1.00) | 0.575 |  |  |
| GGT (U/L) | 1.00 (1.00-1.01) | 0.213 |  |  |

*a.* Logit regression was not applicate because all patients complicated with kidney disease*;b.* Data represent the loading dose administered in 29 of 34 patients.

BMI, body mass index; APACHE-Ⅱ scores, Acute Physiology and Chronic Health Evaluation Ⅱ scores; SOFA score, Sequential Organ Failure Assessment Score; ACCI, Adjusted Charlson comorbidity index; BL-BLI, Beta-lactam/beta-lactamase inhibitor combinations; PCT, Procalcitonin; WBC, White blood cell; NUET, Neutrophils; LY, Lymphocyte; CRP, C-reactive protein; TP, Total protein; ALB, Serum albumin; TBIL, Total bilirubin; ALP, Alkaline Phosphatase; GGT, Gamma-glutamyl transferase; ALT, Alanine aminotransferase; AST, Aspartate aminotransferase.

* P-value<0.05, ** P-value <0.01.

## Table S6 Summary of demographic characteristics of patients with pneumonia at baseline

| Characteristic | Total  (N=65) | Clinical Success (N=30) | Clinical Failure (N=35) | p-value |
| --- | --- | --- | --- | --- |
| **Gender** |  |  |  | 0.332 |
| Male | 56 (86.15%) | 24 (80.00%) | 32 (91.43%) |  |
| Female | 9 (13.85%) | 6 (20.00%) | 3 (8.57%) |  |
| **Age, years** | 60.00 (46.00, 74.00) | 59.00 (45.00, 68.00) | 61.00 (50.50, 74.50) | 0.411 |
| **Weight, kg** | 62.00 (60.00, 69.00) | 61.00 (60.00, 67.00) | 62.00 (59.50, 70.00) | 0.974 |
| **BMI, kg/m2** | 22.41 (20.76, 24.01) | 22.49 (20.76, 24.22) | 22.04 (20.76, 24.00) | 0.717 |
| **APACHE-II scores** | 20.00 (15.00, 23.00) | 19.00 (14.00, 23.00) | 20.00 (15.50, 23.50) | 0.598 |
| **SOFA score** | 10.00 (8.00, 13.00) | 8.50 (6.00, 12.00) | 11.00 (9.00, 14.00) | 0.006** |
| **ACCI** | 3.65 ± 2.50 | 2.90 ± 2.02 | 4.29 ± 2.71 | 0.024* |
| **Spesis shock** | 39 (60.00%) | 14 (46.67%) | 25 (71.43%) | 0.075 |
| **Comorbidities** |  |  |  |  |
| Respiratory disease | 56 (86.15%) | 27 (90.00%) | 29 (82.86%) | 0.638 |
| Cardiovascular disease | 36 (55.38%) | 16 (53.33%) | 20 (57.14%) | 0.954 |
| Hepatic disease | 20 (30.77%) | 9 (30.00%) | 11 (31.43%) | 1.000 |
| Central nervous system disease | 21 (32.31%) | 10 (33.33%) | 11 (31.43%) | 1.000 |
| Kidney disease | 45 (69.23%) | 21 (70.00%) | 24 (68.57%) | 1.000 |
| Acute pancreatitis | 6 (9.23%) | 4 (13.33%) | 2 (5.71%) | 0.530 |
| Diabetes | 20 (30.77%) | 12 (40.00%) | 8 (22.86%) | 0.221 |
| Immunodeficiency | 6 (9.23%) | 1 (3.33%) | 5 (14.29%) | 0.275 |
| Malignancy | 8 (12.31%) | 3 (10.00%) | 5 (14.29%) | 0.884 |
| **Pathogen** |  |  |  |  |
| A. baumannii | 49 (75.38%) | 25 (83.33%) | 24 (68.57%) | 0.276 |
| K. pneumoniae | 23 (35.38%) | 14 (46.67%) | 9 (25.71%) | 0.133 |
| P. aeruginosa | 14 (21.54%) | 5 (16.67%) | 9 (25.71%) | 0.561 |
| E.coli | 5 (7.69%) | 3 (10.00%) | 2 (5.71%) | 0.857 |
| Others | 20 (30.77%) | 9 (30.00%) | 11 (31.43%) | 1.000 |
| **MIC, mg/L** |  |  |  | 0.627 |
| ≤0.5 | 40 (61.54%) | 19 (63.33%) | 21 (60.00%) |  |
| 1 | 5 (7.69%) | 1 (3.33%) | 4 (11.43%) |  |
| 2 | 13 (20.00%) | 6 (20.00%) | 7 (20.00%) |  |
| Unknown | 7 (10.77%) | 4 (13.33%) | 3 (8.57%) |  |
| **Concomitant drugs** |  |  |  |  |
| Aminoglycosides | 3 (4.62%) | 1 (3.33%) | 2 (5.71%) | 1.000 |
| BL-BLI | 23 (35.38%) | 8 (26.67%) | 15 (42.86%) | 0.271 |
| Carbapenem | 27 (41.54%) | 12 (40.00%) | 15 (42.86%) | 1.000 |
| Glycylcycline | 42 (64.62%) | 20 (66.7%) | 22 (62.86%) | 0.952 |
| Inhaled polymyxin | 29 (44.62%) | 10 (33.33%) | 19 (54.29%) | 0.149 |
| Quinolone | 2 (3.08%) | 0 | 2 (5.71%) | 0.542 |
| **CRRT** | 24 (36.92%) | 7 (23.33%) | 18 (51.43%) | 0.039* |
| **Dose, mg/kg** |  |  |  |  |
| Loading dose*a* | 1.82 (1.61, 2.24) | 1.94 (1.67, 2.36) | 1.68 (1.57, 2.00) | 0.204 |
| Maintenance dose | 0.94 (0.83, 1.25) | 0.94 (0.83, 1.25) | 0.94 (0.83, 1.22) | 0.874 |
| **Days of therapy** | 12.00 (8.00, 20.00) | 12.00 (9.00, 24.00) | 12.00 (7.50, 15.50) | 0.263 |
| **Daily dose by weight, mg/kg/d** | 1.97 (1.70, 2.50) | 1.91 (1.68, 2.50) | 2.05 (1.78, 2.57) | 0.392 |
| **Laboratory data at baseline** | | |  |  |
| PCT (ng/ml) | 2.50 (0.96, 5.11) | 2.72 (1.10, 9.29) | 2.06 (0.92, 4.05) | 0.221 |
| WBC (×10^9/L) | 12.00 (7.94, 16.48) | 12.30 (8.80, 16.83) | 11.96 (6.42, 15.80) | 0.407 |
| NEUT (×10^9/L) | 10.14 (7.06, 14.90) | 10.21 (7.11, 13.95) | 10.14 (6.46, 15.39) | 0.818 |
| LY (×10^9/L) | 0.61 (0.34, 1.01) | 0.95 (0.50, 1.14) | 0.40 (0.23, 0.77) | 0.002** |
| CRP (mg/L) | 104.69 (51.14, 183.27) | 127.30 (55.25, 189.07) | 90.56 (50.97, 139.60) | 0.241 |
| TP (g/L) | 57.30 (51.70, 64.70) | 61.10 (51.80, 67.10) | 56.40 (51.55, 62.20) | 0.250 |
| ALB (g/L) | 33.00 (28.10, 36.60) | 34.30 (28.00, 36.60) | 32.50 (28.40, 36.30) | 0.989 |
| TBIL (μmol/L) | 26.80 (16.70, 63.90) | 21.50 (15.10, 31.30) | 34.20 (19.40, 101.50) | 0.029* |
| ALT (U/L) | 26.00 (14.00, 47.00) | 19.00 (12.00, 43.00) | 32.00 (14.00, 56.00) | 0.202 |
| AST (U/L) | 41.00 (24.00, 65.00) | 31.00 (24.00, 55.00) | 43.00 (25.50, 70.00) | 0.190 |
| ALP (U/L) | 122.00 (80.00, 195.00) | 121.00 (87.00, 177.00) | 122.00 (78.00, 196.00) | 0.712 |
| GGT (U/L) | 82.00 (42.00, 140.00) | 78.00 (26.00, 137.00) | 87.00 (44.00, 180.00) | 0.263 |

*a.*Data represent the loading dose administered in 67 of 82 patients.

Values presented as Median (IQR) or n (%). BMI, body mass index; APACHE-Ⅱ scores, Acute Physiology and Chronic Health Evaluation Ⅱ scores; SOFA score, Sequential Organ Failure Assessment Score; ACCI, Adjusted Charlson comorbidity index; CRRT, Continuous renal replacement therapy; BL-BLI, Beta-lactam/beta-lactamase inhibitor combinations; PCT, Procalcitonin; WBC, White blood cell; NUET, Neutrophils; LY, Lymphocyte; CRP, C-reactive protein; TP, Total protein; ALB, Serum albumin; TBIL, Total bilirubin; ALT, Alanine aminotransferase; AST, Aspartate aminotransferase; ALP, Alkaline Phosphatase; GGT, Gamma-glutamyl transferase.

* P-value<0.05, ** P-value <0.01.

## Table S7 Summary of demographic characteristics during the blood collection

| **Characteristic** | **﻿Model development (N=80)** | **﻿Model validation (N=23)** |
| --- | --- | --- |
| **Gender, n (%)** |  |  |
| Male | 70 (87.50%) | 18 (78.26%) |
| Female | 10 (12.50%) | 5 (21.74%) |
| **Age, years** | 56.10 ± 16.39 | 59.57 ± 10.54 |
| **Weight, kg** | 63.84 ± 10.93 | 63.47 ± 11.06 |
| **﻿Fluid output in 24h, mL** | 3918.14 ± 1511.93 | 3896.06 ±1128.39 |
| **﻿Fluid input in 24h, mL** | 3949.96 ± 1592.85 | 4295.39 ± 2123.83 |
| **Urine in 24h** | 1502.86 ± 1640.23 | 1139.94 ± 1141.65 |
| **﻿CRRT, n (%)** | 39 (48.75%) | 11 (47.83%) |
| **output of CRRT in 24h, mL** | 1611.75 ± 2071.00 | 1823.22 ± 1633.73 |
| **Cr, ﻿umol/L** | 104.44 ± 72.21 | 110.44 ± 62.94 |
| **CrCL, ﻿ml/min** | 80.07 ± 54.22 | 70.69 ± 41.57 |
| **﻿BUN, mmol/L** | 15.17 ± 10.41 | 17.14 ± 6.34 |
| **﻿TP, g/L** | 58.79 ± 9.09 | 61.12±10.89 |
| **﻿ALB, g/L** | 34.57 ± 6.29 | 36.10±6.90 |
| **Lac*a*, mmol/L** | 2.98 ± 3.09 | 2.79±1.69 |

﻿*a* ﻿The highest value of Lac during the blood collection.

Values were presented as No. (%), mean±SD or median (IQR).

﻿Cr, serum creatinine; CrCL, creatinine clearance; BUN, blood urea nitrogen; TBIL, total

bilirubin; TP, total protein; ALB, albumin; Lac, lactate.

## Table S8 ﻿Parameter estimates and bootstrap results of the final population PK model

|  | ﻿Base model | | ﻿Final model | | ﻿Bootstrap | | |
| --- | --- | --- | --- | --- | --- | --- | --- |
| ﻿Parameter | ﻿Estimated | ﻿Shrinkage (%) | Estimated | ﻿Shrinkage (%) | ﻿Median | ﻿CV% | ﻿95%CI |
| tvV | 8.438 | 27.630 | 7.184 | 23.497 | 5.574 | 22.076 | 2.992, 7.863 |
| tvV2 | 15.778 | 29.895 | 14.802 | 24.042 | 15.841 | 12.394 | 12.687, 20.204 |
| tvCL | 3.072 | 5.450 | 1.784 | 5.931 | 1.746 | 9.332 | 1.471, 2.112 |
| tvQ | 8.851 | 25.681 | 9.210 | 30.117 | 9.561 | 14.353 | 7.265, 12.599 |
| dCldCRRT | - | - | 1.104 | N/A | 1.111 | 11.851 | 0.851, 1.356 |
| dCldwt* | - | - | 1.895 | N/A | 1.765 | 25.176 | 0.778, 2.466 |
| dCl2dwt* | - | - | 1.701 | N/A | 1.657 | 30.894 | 0.700, 3.635 |
| ﻿ωV | 0.642 | N/A | 0.779 | N/A | 0.532 | N/A | N/A |
| ﻿ωV2 | 0.641 | N/A | 0.614 | N/A | 0.520 | N/A | N/A |
| ﻿ωCL | 0.735 | N/A | 0.338 | N/A | 0.320 | N/A | N/A |
| ﻿ωQ | 0.795 | N/A | 0.451 | N/A | 0.487 | N/A | N/A |

﻿*The center value of weight (wt) was 63.00kg.

CV%, percent confidence of variation; CI, confidence interval; tvV, typical value of volume of

central compartment distribution (V); tvV2, typical value of volume of peripheral compartment

distribution (V2); tvCL, typical value of central compartment clearance (CL); tvQ, typical value of

inter-compartmental clearance (Q, CL2); dCLdCRRT, fixed-parameter coefficient of continuous

renal replacement therapy (CRRT) to CL; ωV, variance of inter-individual variability for V; N/A,

not applicable.

## Table S9 The probability of target attainment (PTA) for different dosing regimens in patients with weight range of 40-80kg

|  | PTA (%) | | | | |
| --- | --- | --- | --- | --- | --- |
|  | LD 100mg + MD 50mg q12h | LD 150mg +  MD 75mg q12h | LD 200mg + MD 100mg q12h | LD 200mg +  MD 125mg q12h | LD 2.5mg/kg+  MD 1.5mg/kg q12h |
| **Non-CRRT** | |  |  |  |  |
| 40kg | 99.90% | 99.90% | 100.00% | 100.00% | 99.90% |
| 50kg | 96.70% | 99.30% | 99.90% | 99.90% | 99.30% |
| 60kg | 89.60% | 95.40% | 98.20% | 99.10% | 97.10% |
| 70kg | 80.00% | 88.60% | 93.20% | 96.00% | 94.10% |
| 80kg | 67.70% | 80.20% | 86.60% | 90.60% | 90.20% |
| **CRRT** |  |  |  |  |  |
| 40kg | 76.90% | 86.60% | 92.10% | 95.40% | 81.10% |
| 50kg | 53.40% | 68.90% | 78.80% | 84.20% | 68.90% |
| 60kg | 33.00% | 49.30% | 60.20% | 68.40% | 56.40% |
| 70kg | 18.60% | 31.30% | 43.70% | 51.60% | 45.70% |
| 80kg | 10.70% | 19.20% | 28.00% | 36.40% | 34.90% |
