# Supplementary material for: WITHDRAWN: Clinical efficacy and pharmacokinetics/pharmacodynamics analysis of intravenous polymyxin B for critically ill patients with sepsis
Source: Research Square preprint supplement (doi:10.21203/rs.3.rs-8434801/v1), 2026-01-22
Supplement: Supplementary file 2 [file 86359ae732ca86e62ece1659.docx]

**Supplement 3**

[Figure S1. Estimated AUC/ Actual AUC ratio plot for prospective prediction of the limited sampling strategy in 13 patients. 2](#_Toc212819807)

[Figure S2. Goodness-of-fit plots for the final model. 3](#_Toc212819808)

[Figure S3. Prediction-corrected visual predictive check obtained from 500 simulations. 4](#_Toc212819809)


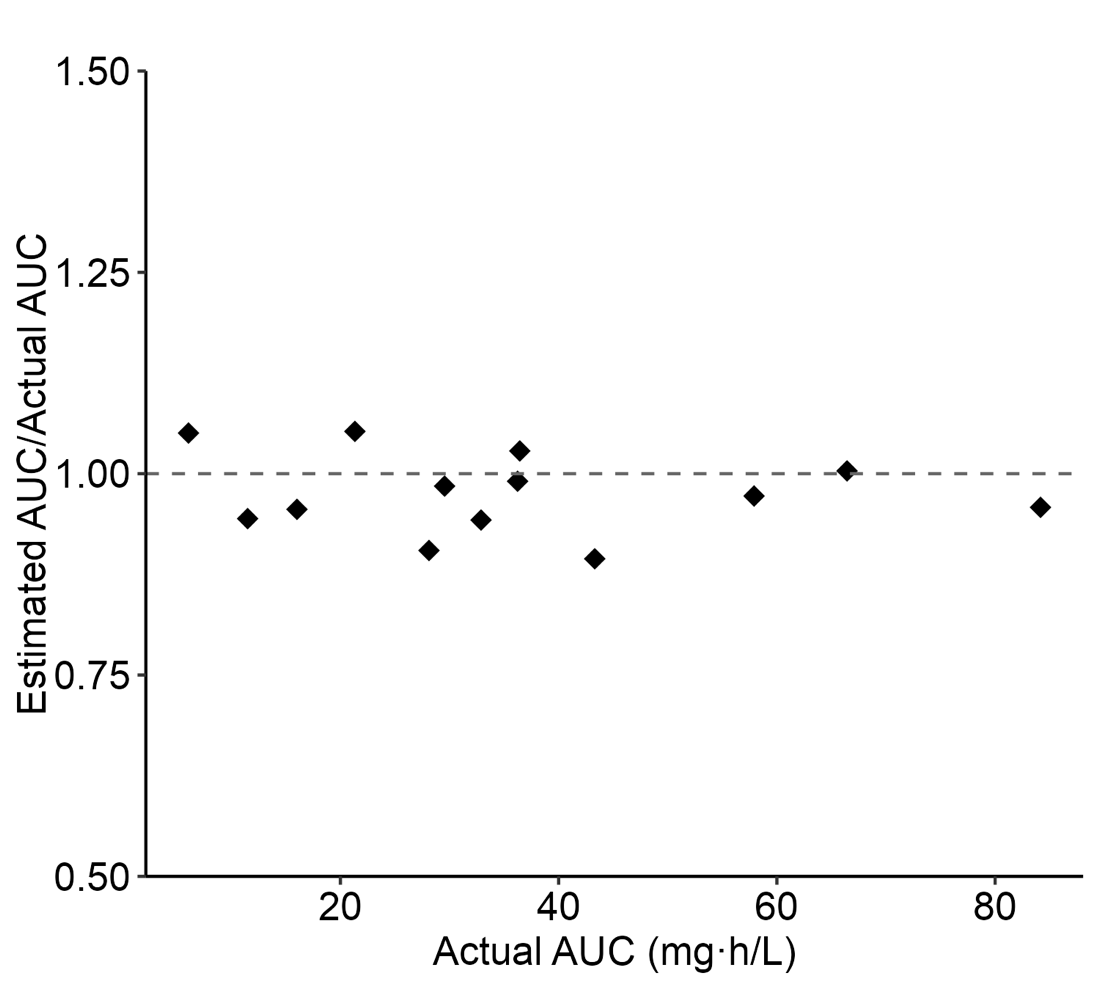


## Figure S1. Estimated AUC/ Actual AUC ratio plot for prospective prediction of the limited sampling strategy in 13 patients.

The estimation of AUC was based on concentrations at 0.5 h and 8 h after the end of infusion.


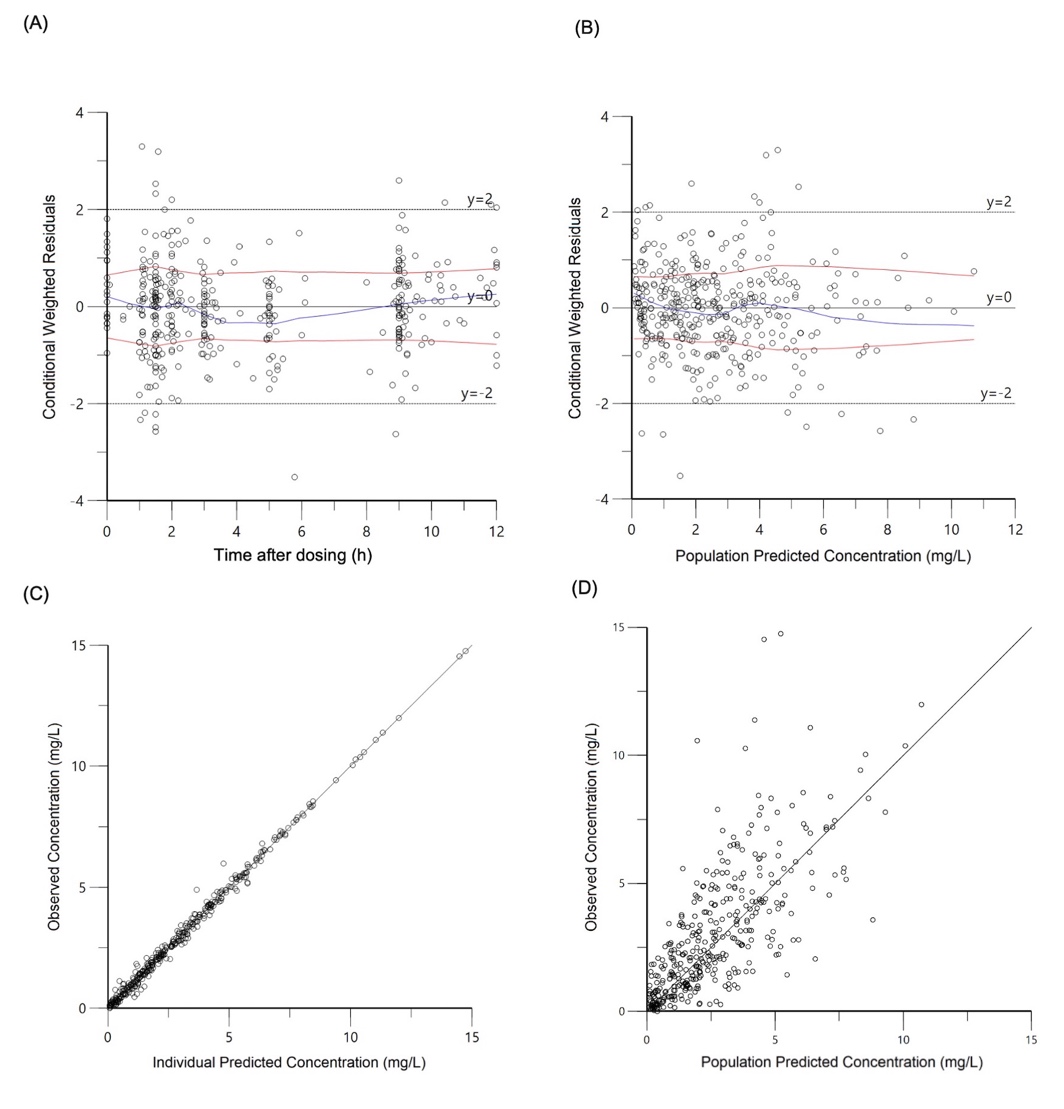


## Figure S2. Goodness-of-fit plots for the final model.

(A) Conditional weighted residuals versus time after dose; (B) conditional weighted residuals versus population predicted concentrations (CWRES versus PRED); (C) Observed concentration versus individual predicted concentrations (DV versus IPRED); (d) Observed concentration (DV) versus population predicted concentrations (DV versus PRED).

The blue lines represent smoothed regression lines; the red lines represent computed absolute regression lines (with their negative reflection).

##
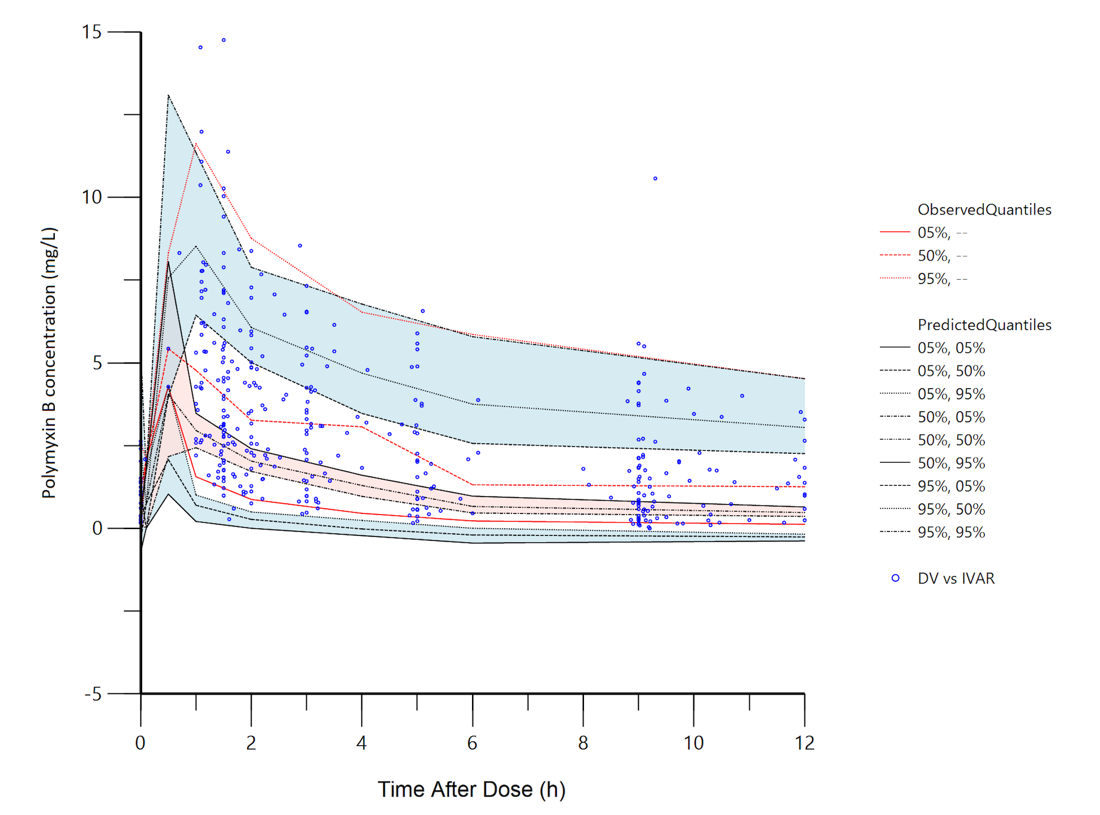
Figure S3. Prediction-corrected visual predictive check obtained from 500 simulations.

The dots are the observed drug concentrations. Red lines represent the 5th, 50th and 95th percentiles of the observed concentrations; black lines represent the 5th, 50th and 95th percentiles of the predicted concentrations. Shaded areas represent the 95% CIs of the 5th, 50th and 95th percentiles of the simulated concentrations, respectively.
