# Supplementary material for: WITHDRAWN: Clinical efficacy and pharmacokinetics/pharmacodynamics analysis of intravenous polymyxin B for critically ill patients with sepsis
Source: Research Square preprint supplement (doi:10.21203/rs.3.rs-8434801/v1), 2026-01-22
Supplement: Supplementary file 3 [file d78d793040b8ed71ad023871.docx]

Population pharmacokinetics analysis

The PPK model was performed with Phoenix® NLME software (V8.1; Pharsight, Mountain View, CA, USA). The first-order conditional estimation-extended least square method (FOCE-ELS) was used to develop the PPK model. The dataset was randomly split into model development group and model validation group at a ratio of 8:2.

Different PK models (one- and two-compartment models) were compared based on the objective function value (OFV), Akaike information criterion and Bayesian information criterion. The interindividual variability of PK parameters was assumed by additive, proportional or mixed (additive plus proportional) models. The covariate (age, sex, body weight, height, TBIL, DBIL, ALB, TP, BUN, lactate (Lac), SCr, 24-h fluid intake and output, application of CRRT or not, and CLCr) selection was evaluated using a stepwise process. The mean value of the covariate was used to normalize the covariate.

A decrease >6.63 (P = 0.01) of OFV for forward addition and an increase of OFV >10.83 (P = 0.001) for backward elimination were the inclusion criteria for covariates. Goodness-of-fit plots were used for model evaluation. The internally validations of the final model were completed with bootstrap analysis with 1000 samples and a prediction-corrected visual predictive check (VPC) plot with 500 replicates. External validation was assessed with (individual residual errors) IRES from the model validation group.
